# Supplementary material for: The complete chloroplast genome sequences and phylogenetics of Cornus sanguinea L. and Cornus sericea L. (Cornaceae)
Source: Research Square preprint supplement (doi:10.21203/rs.3.rs-5965562/v1), 2025-02-10
Supplement: Supplementary file 1 [file e9eae432a412c7bedd20c0d9.xlsx]

## Sheet: Sheet1
Accession number	Specie	Clade	Order	Family	Genus	Classification
NC_058318.1	Cornus walteri	Asterids	Cornales	Cornaceae	Cornus	BW
MN380671.1	Cornus florida var. urbiniana isolate FCN17100	Asterids	Cornales	Cornaceae	Cornus	BB
NC_056267.1	Cornus elliptica	Asterids	Cornales	Cornaceae	Cornus	BB
NC_063837.1	Cornus wilsoniana	Asterids	Cornales	Cornaceae	Cornus	BW
NC_059720.1	Cornus alba voucher Wangjun Yuan 2020080601	Asterids	Cornales	Cornaceae	Cornus	BW
NC_044825.1	Cornus peruviana isolate FCN17105	Asterids	Cornales	Cornaceae	Cornus	BW
OR545260.1 OR545260.1	Cornus hongkongensis	Asterids	Cornales	Cornaceae	Cornus	BB
MH729079.1	Cornus officinalis	Asterids	Cornales	Cornaceae	Cornus	CC
NC_060994.1	Cornus sunhangii	Asterids	Cornales	Cornaceae	Cornus	BB
NC_060800.1	Cornus bretschneideri	Asterids	Cornales	Cornaceae	Cornus	BW
MN380667.1	Cornus sanguinea isolate FCN1796	Asterids	Cornales	Cornaceae	Cornus	BW
NC_044813.1	Cornus volkensii isolate FCN1792	Asterids	Cornales	Cornaceae	Cornus	СС
NC_044822.1	Cornus canadensis	Asterids	Cornales	Cornaceae	Cornus	DW
NC_044823.1	Cornus suecica isolate FCN17103	Asterids	Cornales	Cornaceae	Cornus	DW
NC_084212.1	Cornus capitata	Asterids	Cornales	Cornaceae	Cornus	BB
NC_044816.1	Cornus eydeana isolate FCN1795	Asterids	Cornales	Cornaceae	Cornus	CC
NC_044818.1	Cornus kousa isolate FCN1797	Asterids	Cornales	Cornaceae	Cornus	BB
NC_044819.1	Cornus disciflora isolate FCN1798	Asterids	Cornales	Cornaceae	Cornus	BB
NC_044821.1	Cornus nuttallii isolate FCN17101	Asterids	Cornales	Cornaceae	Cornus	BB
NC_044810.1	Cornus macrophylla isolate FCN1789	Asterids	Cornales	Cornaceae	Cornus	BW
NC_030260.1	Cornus controversa voucher SCONT20150712	Asterids	Cornales	Cornaceae	Cornus	BW
NC_044811.1	Cornus oblonga isolate FCN1790	Asterids	Cornales	Cornaceae	Cornus	BW
NC_044812.1	Cornus alternifolia isolate FCN1791	Asterids	Cornales	Cornaceae	Cornus	BW
NC_044814.1	Cornus sessilis isolate FCN1793	Asterids	Cornales	Cornaceae	Cornus	CC
NC_044815.1	Cornus chinensis isolate FCN1794	Asterids	Cornales	Cornaceae	Cornus	CC
NC_084211.1	Cornus multinervosa	Asterids	Cornales	Cornaceae	Cornus	BB
MG524996.1	Alangium chinense	Asterids	Cornales	Cornaceae	Alangium
MG525003.1	Alangium alpinum	Asterids	Cornales	Cornaceae	Alangium
NC_044827.1	Alangium platanifolium isolate FCN17107	Asterids	Cornales	Cornaceae	Alangium
NC_035662.1	Hydrangea luteovenosa	Asterids	Cornales	Hydrangeaceae	Hydrangea
OL405445.1	Hydrangea platyarguta	Asterids	Cornales	Hydrangeaceae	Hydrangea
NC_034936.1	Hydrangea petiolaris	Asterids	Cornales	Hydrangeaceae	Hydrangea
NC_034935.1	Hydrangea hydrangeoides	Asterids	Cornales	Hydrangeaceae	Hydrangea
NC_084218.1	Hydrangea arguta voucher YNUHHYD002	Asterids	Cornales	Hydrangeaceae	Hydrangea
NC_084217.1	Hydrangea alternifolia voucher YNUHHYD001	Asterids	Cornales	Hydrangeaceae	Hydrangea
NC_044805.1	Hydrangea moellendorffii isolate FCN1640	Asterids	Cornales	Hydrangeaceae	Hydrangea
NC_044804.1	Hydrangea densifolia isolate FCN1639	Asterids	Cornales	Hydrangeaceae	Hydrangea
NC_044832.1	Hydrangea barbara isolate FCN17116	Asterids	Cornales	Hydrangeaceae	Hydrangea
NC_044833.1	Hydrangea obtusifolia isolate FCN17117	Asterids	Cornales	Hydrangeaceae	Hydrangea
NC_084221.1	Hydrangea bifida voucher YNUHHYD008	Asterids	Cornales	Hydrangeaceae	Hydrangea
NC_044809.1	Hydrangea caerulea isolate FCN1787	Asterids	Cornales	Hydrangeaceae	Hydrangea
MN380679.1	Nyssa ogeche isolate FCN17109	Asterids	Cornales	Nyssaceae	Nyssa
KX904873.1	Nyssa sinensis	Asterids	Cornales	Nyssaceae	Nyssa
MG524995.1	Nyssa wenshanensis	Asterids	Cornales	Nyssaceae	Nyssa
KX904872.1	Davidia involucrata	Asterids	Cornales	Nyssaceae	Davidia
KX904871.1	Camptotheca acuminata	Asterids	Cornales	Nyssaceae	Camptotheca
MG525001.1	Mastixia caudatilimba	Asterids	Cornales	Nyssaceae	Mastixia
NC_029750.1	Diplopanax stachyanthus voucher DSTACH20141227	Asterids	Cornales	Nyssaceae	Diplopanax
NC_058874.1	Aucuba japonica	Asterids	Garryales	Garryaceae	Aucuba
NC_058873.1	Aucuba eriobotryifolia	Asterids	Garryales	Garryaceae	Aucuba
NC_058872.1	Aucuba chlorascens	Asterids	Garryales	Garryaceae	Aucuba
NC_080890.1	Aucuba filicauda	Asterids	Garryales	Garryaceae	Aucuba
NC_080889.1	Aucuba confertiflora	Asterids	Garryales	Garryaceae	Aucuba
NC_080888.1	Aucuba chinensis	Asterids	Garryales	Garryaceae	Aucuba
NC_056113.1	Aucuba obcordata voucher TY2934	Asterids	Garryales	Garryaceae	Aucuba
NC_080891.1	Garrya buxifolia	Asterids	Garryales	Garryaceae	Garrya
NC_000932.1	Arabidopsis thaliana	Rosids	Brassicales	Brassicaceae	Arabidopsis
NC_044846.1	Curtisia dentata isolate Y459	Asterids	Cornales	Curtisiaceae	Curtisia
NC_044844.1	Grubbia tomentosa isolate Y451	Asterids	Cornales	Grubbiaceae	Grubbia
NC_044845.1	Grubbia rosmarinifolia isolate Y453	Asterids	Cornales	Grubbiaceae	Grubbia
PP811661	Cornus sericea	Asterids	Cornales	Cornaceae	Cornus	BW
PP818646	Cornus sanguinea	Asterids	Cornales	Cornaceae	Cornus	BW

## Sheet: Sheet2
Accession number	Specie
MT579968.1	UNVERIFIED: Cornus sericea
NC_058318.1	Cornus walteri
MN380671.1	Cornus florida var. urbiniana isolate FCN17100
NC_056267.1	Cornus elliptica
NC_063837.1	Cornus wilsoniana
NC_059720.1	Cornus alba voucher Wangjun Yuan 2020080601
NC_044825.1	Cornus peruviana isolate FCN17105
OR545260.1	Cornus hongkongensis
MH729079.1	Cornus officinalis
NC_060994.1	Cornus sunhangii
NC_060800.1	Cornus bretschneideri
MN380667.1	Cornus sanguinea isolate FCN1796
NC_044813.1	Cornus volkensii isolate FCN1792
NC_044822.1	Cornus canadensis
NC_044823.1	Cornus suecica isolate FCN17103
NC_084212.1	Cornus capitata
NC_044816.1	Cornus eydeana isolate FCN1795
NC_044818.1	Cornus kousa isolate FCN1797
NC_044819.1	Cornus disciflora isolate FCN1798
NC_044821.1	Cornus nuttallii isolate FCN17101
NC_044810.1	Cornus macrophylla isolate FCN1789
NC_030260.1	Cornus controversa voucher SCONT20150712
NC_044811.1	Cornus oblonga isolate FCN1790
NC_044812.1	Cornus alternifolia isolate FCN1791
NC_044814.1	Cornus sessilis isolate FCN1793
NC_044815.1	Cornus chinensis isolate FCN1794
OR753215.1	Cornus controversa
NC_084211.1	Cornus multinervosa
ON881508.1	UNVERIFIED: Cornus austrosinensis
MG524996.1	Alangium chinense
MG525003.1	Alangium alpinum
NC_044827.1	Alangium platanifolium isolate FCN17107
NC_035662.1	Hydrangea luteovenosa
OL405445.1	Hydrangea platyarguta
NC_034936.1	Hydrangea petiolaris
NC_034935.1	Hydrangea hydrangeoides
NC_084218.1	Hydrangea arguta voucher YNUHHYD002
NC_084217.1	Hydrangea alternifolia voucher YNUHHYD001
NC_044805.1	Hydrangea moellendorffii isolate FCN1640
NC_044804.1	Hydrangea densifolia isolate FCN1639
NC_044832.1	Hydrangea barbara isolate FCN17116
NC_044833.1	Hydrangea obtusifolia isolate FCN17117
NC_084221.1	Hydrangea bifida voucher YNUHHYD008
NC_044809.1	Hydrangea caerulea isolate FCN1787
MN380679.1	Nyssa ogeche isolate FCN17109
KX904873.1	Nyssa sinensis
MG524995.1	Nyssa wenshanensis
NC_041213.1	Nyssa yunnanensis
KX904872.1	Davidia involucrata
KX904871.1	Camptotheca acuminata
MG525001.1	Mastixia caudatilimba
NC_029750.1	Diplopanax stachyanthus voucher DSTACH20141227
NC_058874.1	Aucuba japonica
NC_058873.1	Aucuba eriobotryifolia
NC_058872.1	Aucuba chlorascens
NC_080890.1	Aucuba filicauda
NC_080889.1	Aucuba confertiflora
NC_080888.1	Aucuba chinensis
NC_056113.1	Aucuba obcordata voucher TY2934
NC_080891.1	Garrya buxifolia
NC_000932.1	Arabidopsis thaliana
NC_044846.1	Curtisia dentata isolate Y459
NC_044844.1	Grubbia tomentosa isolate Y451
NC_044845.1	Grubbia rosmarinifolia isolate Y453
